# Supplementary material for: MCF-7 Drug Resistant Cell Lines Switch Their Lipid Metabolism to Triple Negative Breast Cancer Signature
Source: MDPI journal article supplement (doi:10.3390/cancers13235871), 2021-11-23
Supplement: s1 [file s1]

A

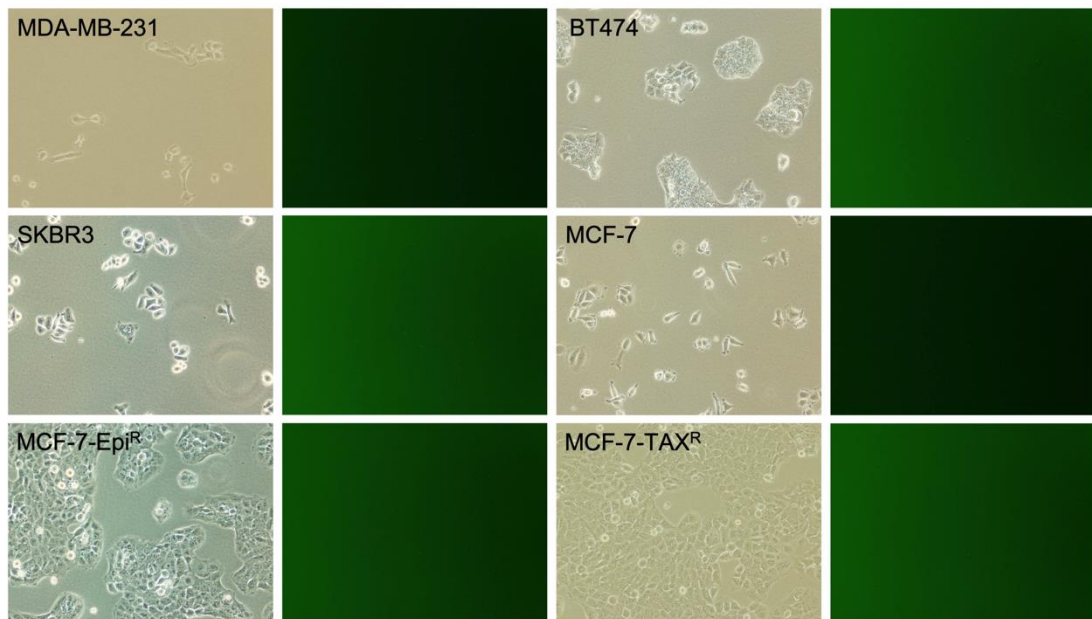

B

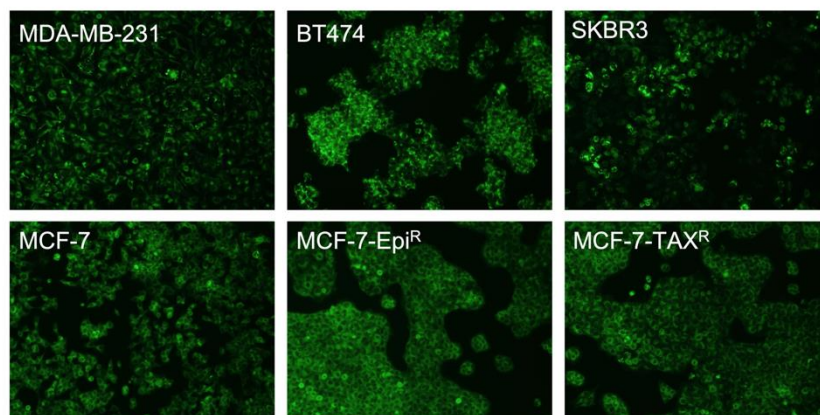

**Supplementary Figure S1: Negative and positive control of PA-BODIPY labelling in BCC.** A) Negative control: BCC intrinsic PA-BODIPY labelling (background) was measured to corroborate that there was not initial label of this lipid within these cell lines. B) Positive control: a well-known concentration of PA-BODIPY was added in order to ensure that the lipid was internalized into the BCC lines.
